# Supplementary material for: Optimising the diagnostic accuracy of First post-contrAst SubtracTed breast MRI (FAST MRI) through interpretation-training: a multicentre e-learning study, mapping the learning curve of NHS Breast Screening Programme (NHSBSP) mammogram readers using an enriched dataset
Source: PubMed Central journal article supplement (PMC11134713; doi:10.1186/s13058-024-01846-1), 2024-05-28
Supplement: 13058_2024_1846_MOESM3_ESM.pdf [file 13058_2024_1846_MOESM3_ESM.pdf]

Additional file 3: Comparison graphic, included to inform discussion of our conclusions on optimal batch size

Changes in concordance with the true outcome (accuracy) by scan position within a batch, and by reader group\*, showing only the readers that completed reading the assessment test set of 125 FAST MRI scans in a single batch (multi-level generalised mixed model using restricted cubic splines with 4 knots fitted to the rank order of FAST MRI scans read per batch)

There were 15 readers that did this (7 from group 1 and 8 from group 2).

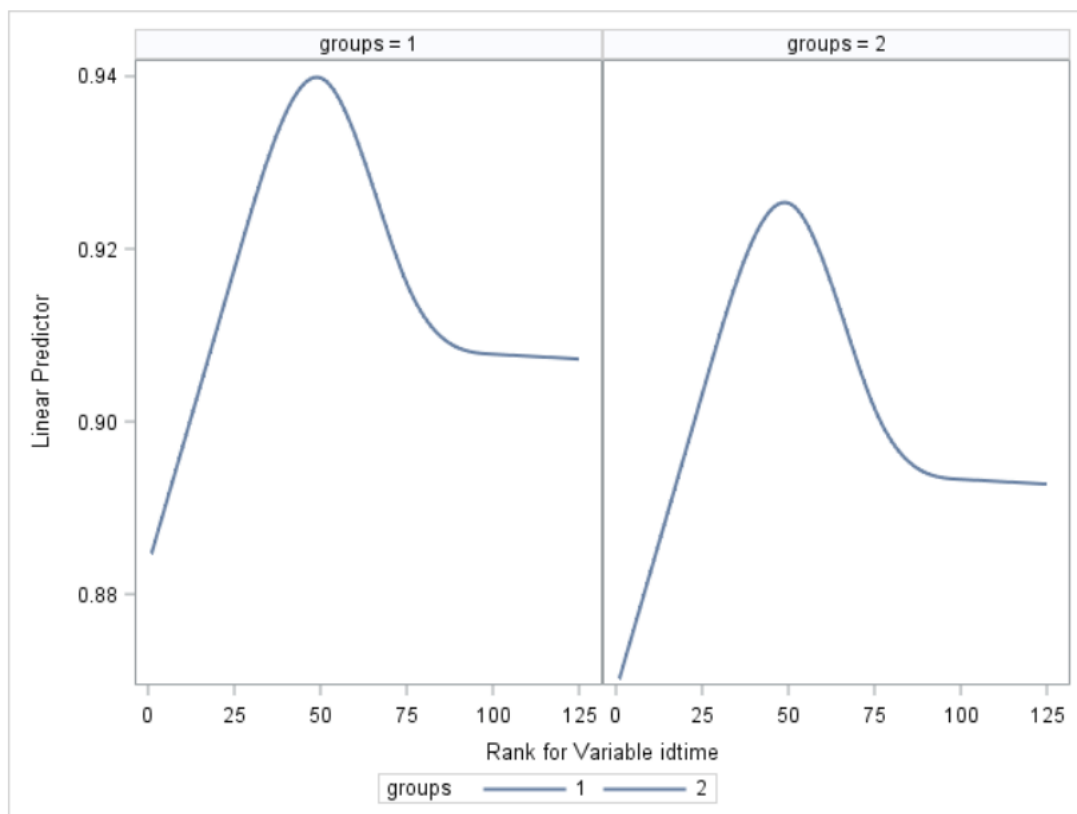

\* Reader group: group 1 = experience of fpMRI interpretation in their usual clinical practice, group 2 = no previous experience of breast MRI interpretation in their clinical practice
